# Supplementary material for: Thermal transition behaviors, solubility, and mechanical properties of wholly aromatic para-, meta-poly(ether-amide)s: effect on numbers of para-aryl ether linkages
Source: Royal Society of Chemistry journal article supplement (doi:10.1039/c6ra11163g), 2016-01-01
Supplement: c6ra11163g1.pdf [file c6ra11163g1.pdf]

## Supporting information

### Thermal transition behaviors, solubility, and mechanical properties of wholly aromatic para-, meta-poly(ether-amide)s: effect on numbers of para-aryl ether linkages

Wen-Qiang Zhang, Xiu-Li Wang\*, Gui-Cheng Liu, Li Chen, Yu-Zhong Wang\*

Center for Degradable and Flame-Retardant Polymeric Materials, College of Chemistry, State Key Laboratory of Polymer Materials Engineering, National Engineering Laboratory of Eco-Friendly Polymeric Materials (Sichuan), Sichuan University, Chengdu 610064, China. Tel. & Fax:+86-28-85410755. E-mail address: xiuliwang1@163.com (X. L. Wang) and yzwang@scu.edu.cn (Y. Z. Wang)

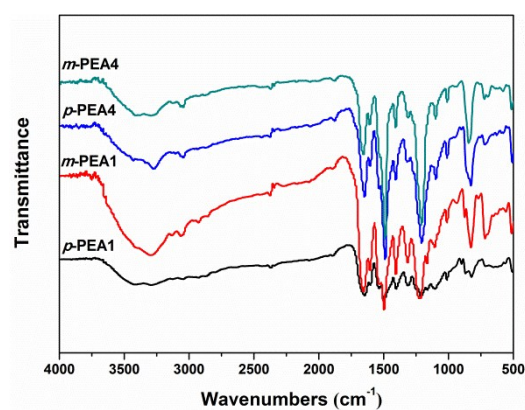

Figure S1. FTIR spectra of PEA1 and PEA4.

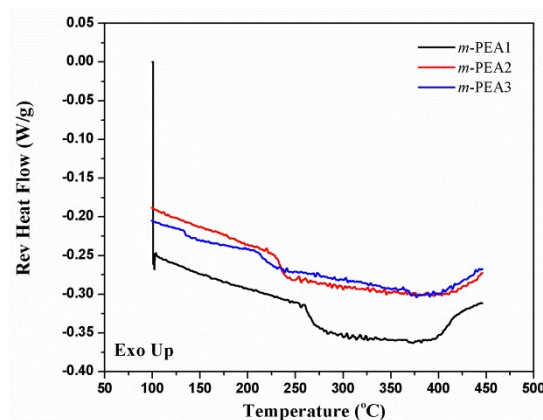

Figure S2. MDSC Rev. Heating curve of *m*-PEA1, *m*-PEA2 and *m*-PEA3.

Solubility parameter  $\delta$  determined by Van Krevelen method <sup>1</sup>

In this study, the solubility parameter of *m*-PEAs was calculated based on Van Krevelen method. Here, we choose *m*-PEA1 ( $M_r=330$  g/mol,  $\rho\approx 1.0$  g/cm<sup>3</sup>) as an example, and calculate the solubility parameter  $\delta_d$ ,  $\delta_p$ ,  $\delta_h$  and  $\delta$  according to the formulas 1-2. In this method, the solubility parameters  $\delta$  are divided into three parts:  $\delta_d$ ,  $\delta_p$ ,  $\delta_h$ , where  $\delta_d$  is correlated with dispersion forces,  $\delta_p$  is correlated with polar forces and  $\delta_h$  is correlated with hydrogen bonding. Similarly,  $F_{di}$  is the molar attraction constant correlated with dispersion forces,  $F_{pi}$  is the molar attraction constant correlated with polar forces and  $E_{hi}$  is the cohesive energy correlated with hydrogen bonding.

$$\delta d = \frac{\sum F_{di}}{V}; \delta p = \frac{\sqrt{\sum F_{pi}^2}}{V}; \delta h = \frac{\sqrt{\sum E_{hi}}}{V}; V = M_r/\rho \quad (1)$$

$$\delta = \sqrt{\delta d^2 + \delta p^2 + \delta h^2} \quad (2)$$

Firstly, we calculate the  $\sum F_{di}$ ,  $\sum F_{pi}^2$  and  $\sum E_{hi}$  based on the data of component group contribution shown in Table S1. And the repeat units of *m*-PEA1 are shown in Scheme S1. Next, the  $\delta_d$ ,  $\delta_p$ ,  $\delta_h$  are calculated according to the formula 1, and the  $\delta$  is calculated according to the formula 2.

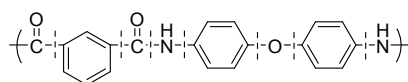

**Scheme S1.** Repeat units of *m*-PEA1.

**Table S1.** Data of group contribution to solubility parameter of *m*-PEA1.

| Structural group                                                                              | $F_{di} / (\text{MJ}\cdot\text{m}^3)^{1/2}\cdot\text{mol}^{-1}$ | $F_{pi} / (\text{MJ}\cdot\text{m}^3)^{1/2}\cdot\text{mol}^{-1}$ | $E_{hi} / \text{J}\cdot\text{mol}^{-1}$ |
|-----------------------------------------------------------------------------------------------|-----------------------------------------------------------------|-----------------------------------------------------------------|-----------------------------------------|
|  (o, m, p) | 1270                                                            | 110                                                             | 0                                       |
| —O—                                                                                           | 100                                                             | 400                                                             | 3000                                    |
|            | 290                                                             | 770                                                             | 2000                                    |
|            | 160                                                             | 210                                                             | 3100                                    |

1. D. W. Van Krevelen, *Properties of Polymers*, Elsevier, Fourth edition, 2009, 240-246.
